# Supplementary material for: A dual-channel optical magnetometer based on magnetically responsive inverse opal microspheres
Source: Royal Society of Chemistry journal article supplement (doi:10.1039/c7tc02119d), 2017-01-01
Supplement: c7tc02119d1.pdf [file c7tc02119d1.pdf]

## Supporting Information

### Dual-Channel Optical Magnetometer Based on Magnetically Responsive Inverse Opal Microspheres

Yuqi Zhang<sup>a</sup>, Yitong Jiang<sup>b</sup>, Xiaojie Wu<sup>b</sup> and Jianping Ge<sup>a, b\*</sup>

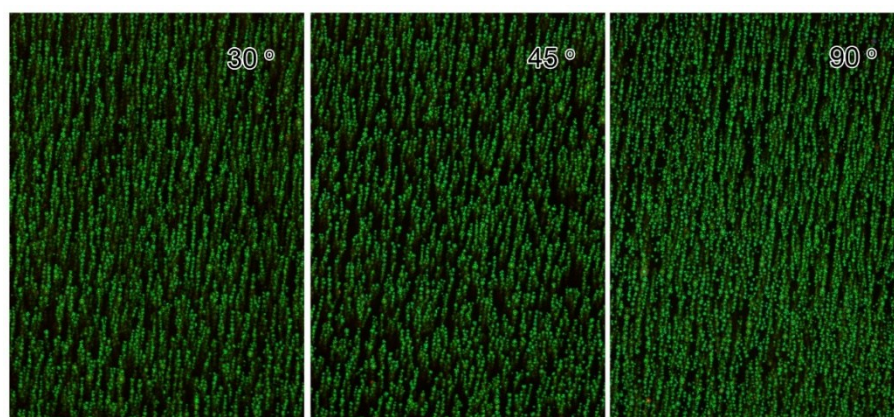

**Figure S1.** Optical microscope images of IOM chains assembled in three magnetic fields, which are tilted 30°, 45° and 90° from the incident direction.

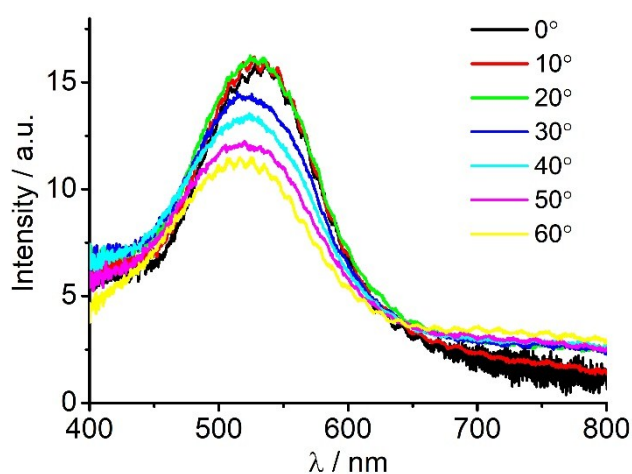

**Figure S2.** Reflection spectra of IOMs when both the incident angle and reflected angle are changed from 0° to 60°.
